# Supplementary material
Source: PubMed Central journal article supplement (PMC9034808)
Supplement: KID.0006672021SupplementaryData.pdf [file KID.0006672021SupplementaryData.pdf]

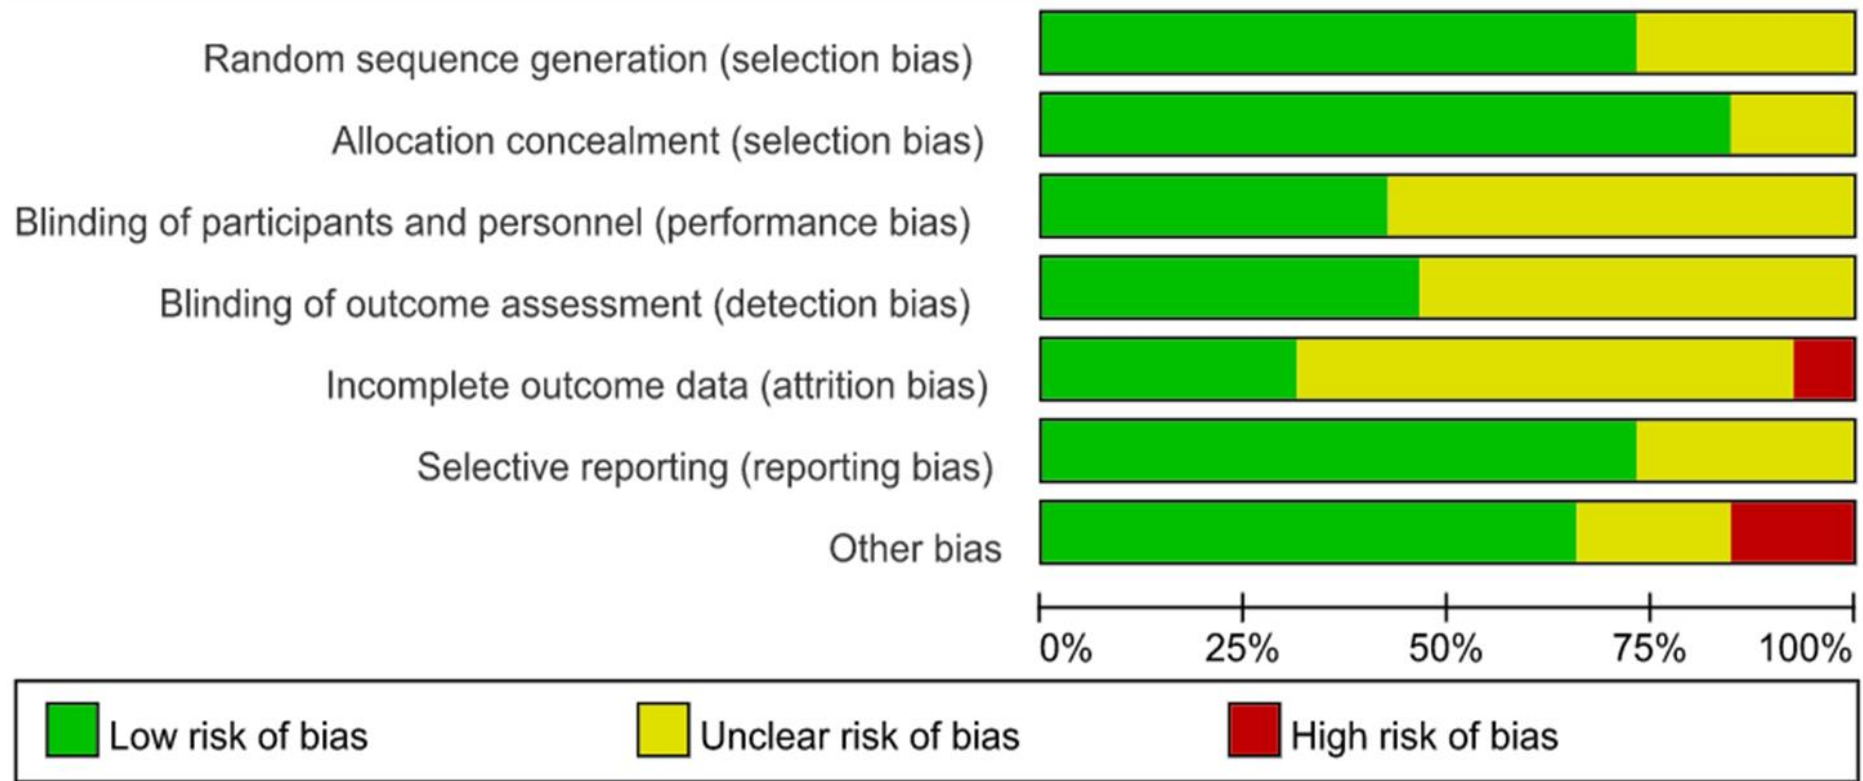

A

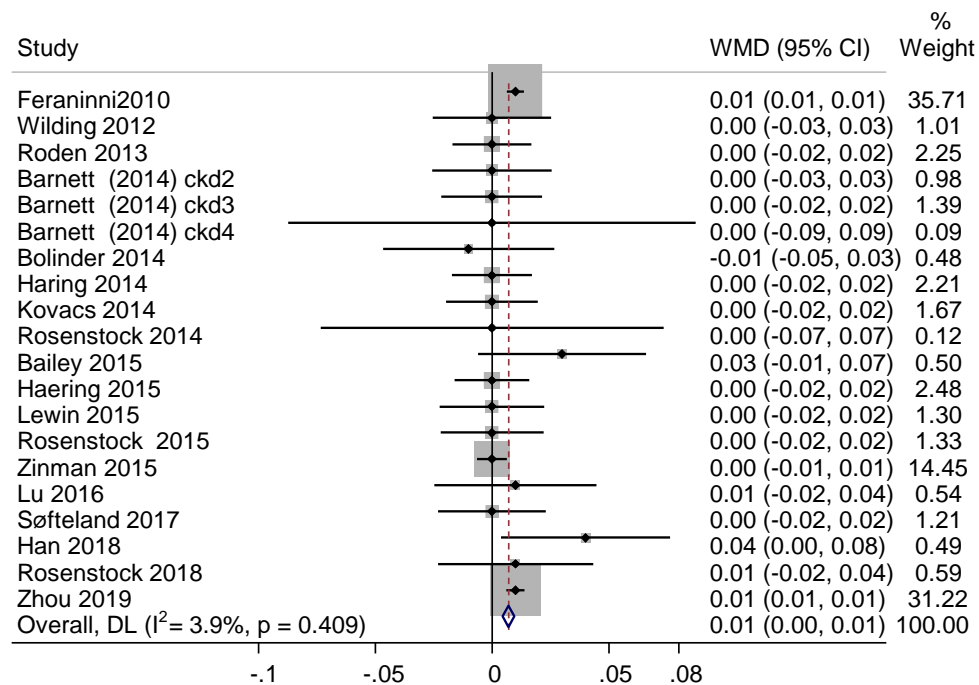

B

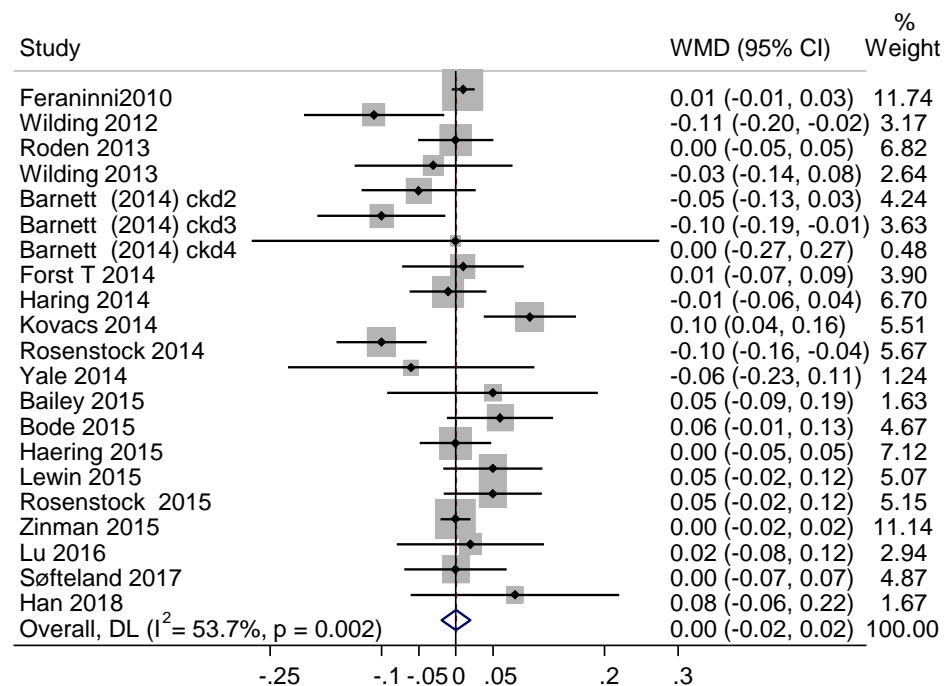

C

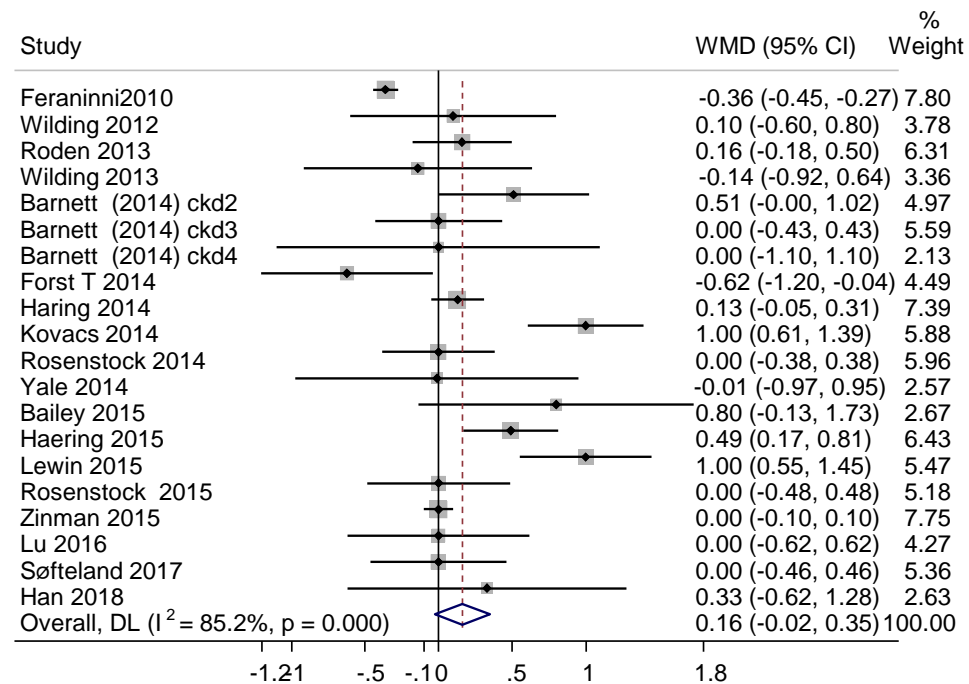

A

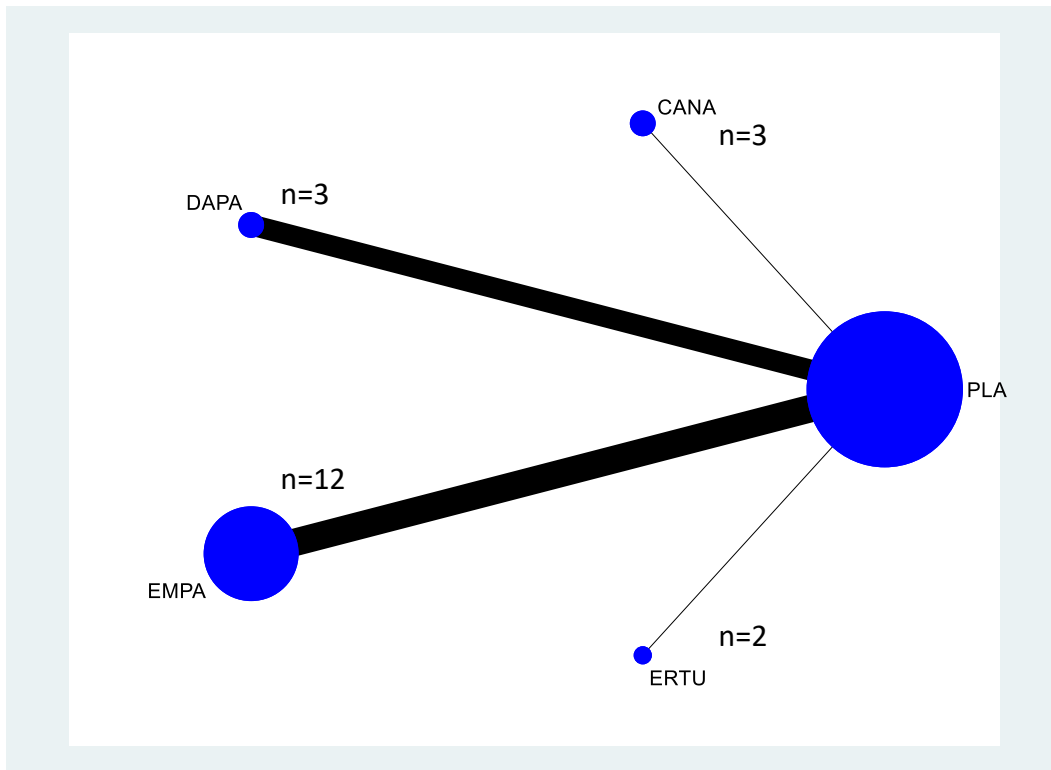

B

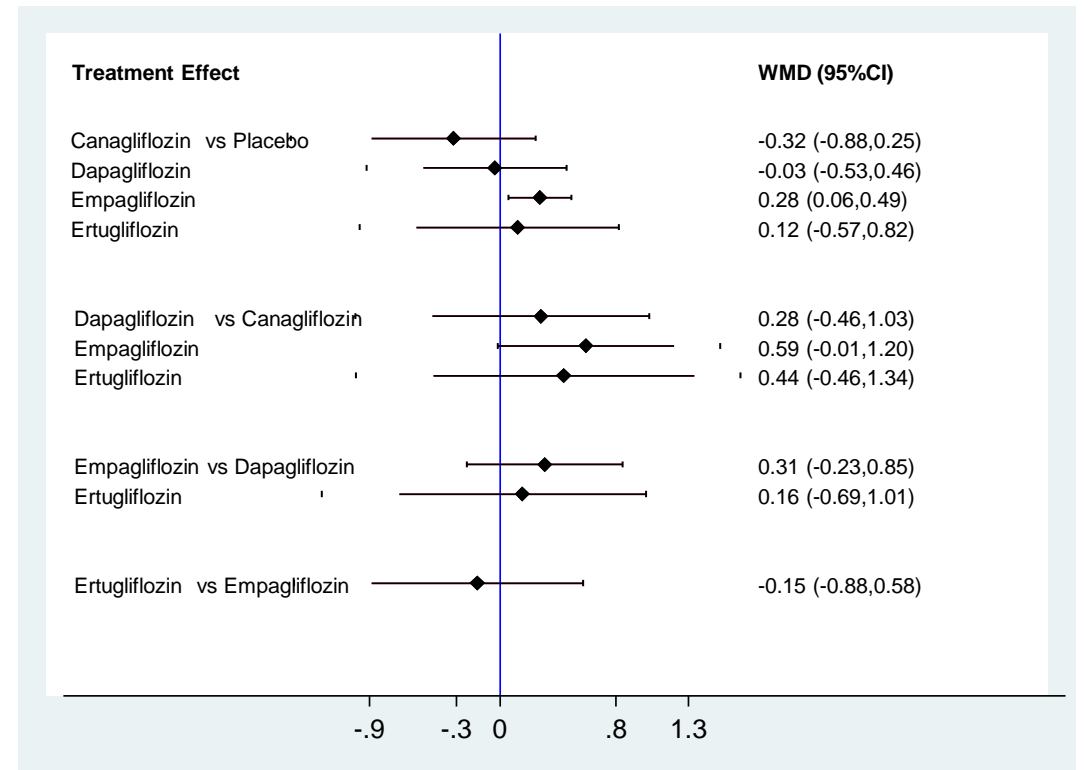

**Supplemental Figure 3A.** Network of eligible comparisons for the multiple-SGLT2 inhibitors meta-analysis for effects on blood sodium levels.

**Supplemental Figure 3B.** Network meta-analysis of eligible trials for the effects of SGLT2 inhibitors on blood sodium levels (mmol/L).

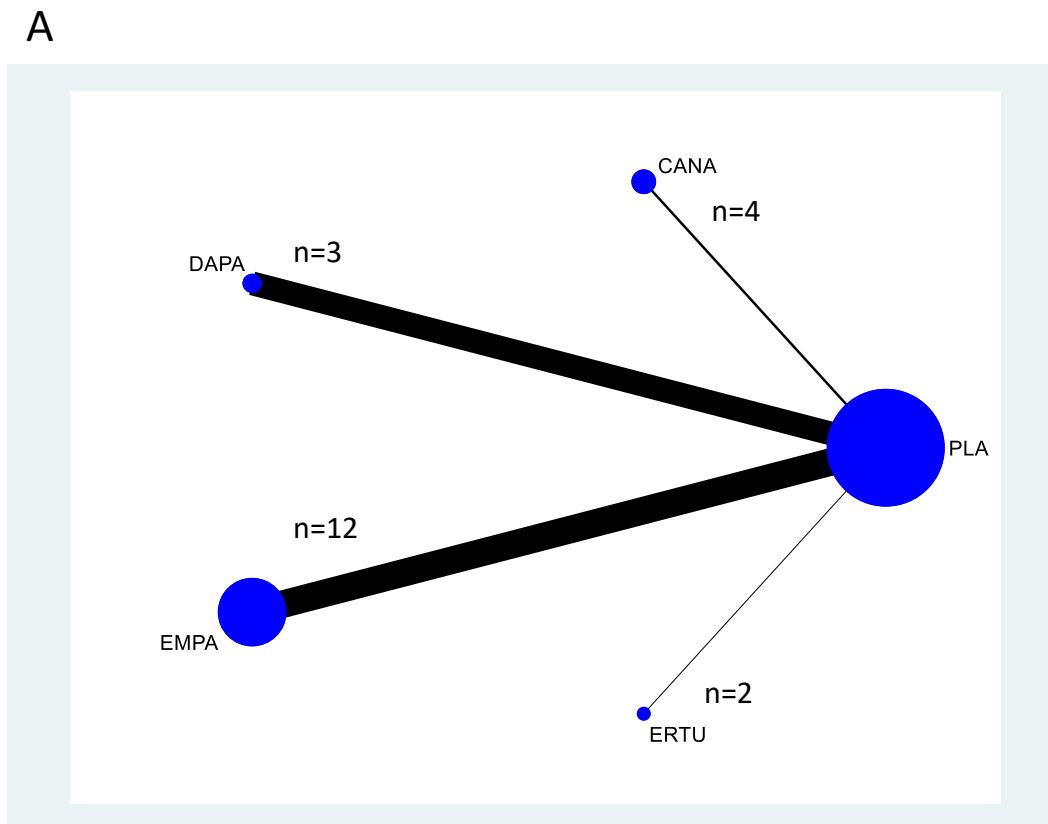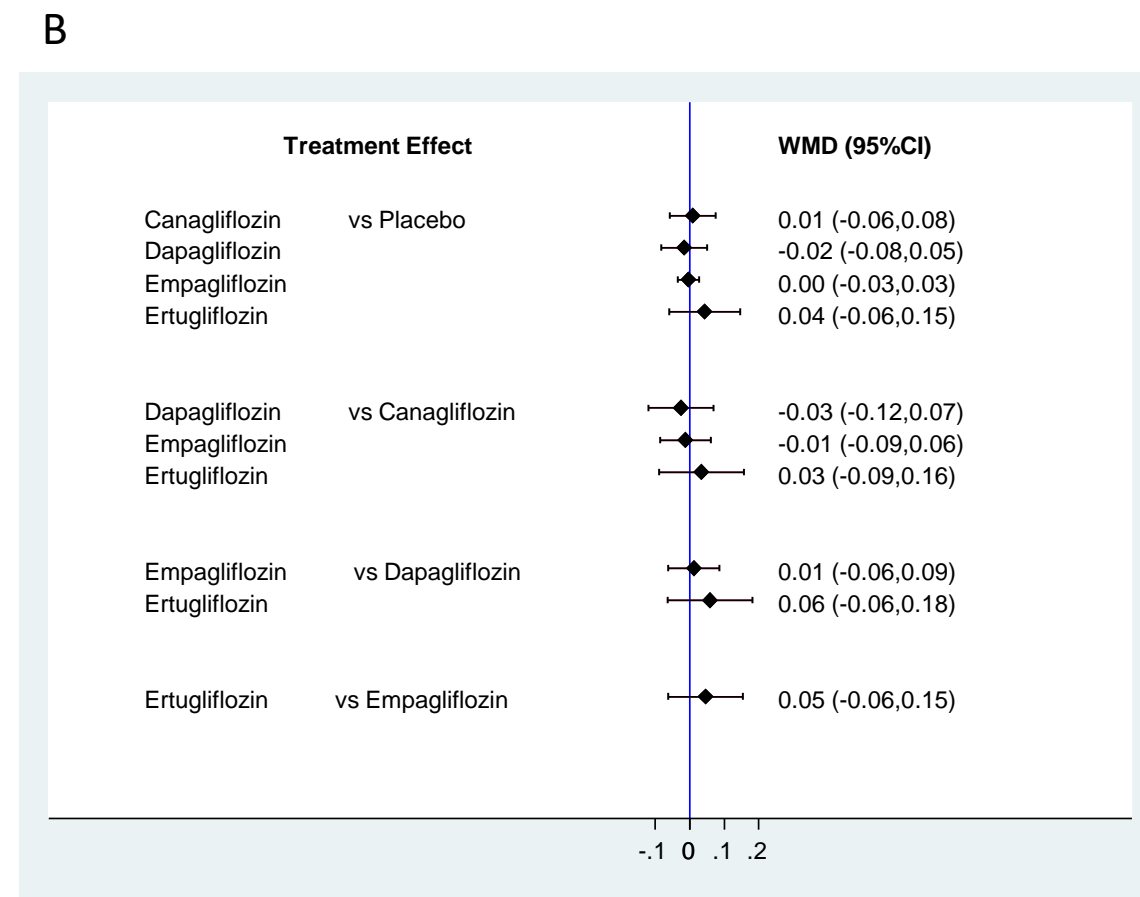

**Supplemental Figure 4A.** Network of eligible comparisons for the multiple-SGLT2 inhibitors meta-analysis for effects on blood potassium levels.  
**Supplemental Figure 4B.** Network meta-analysis of eligible trials for the effects of SGLT2 inhibitors on blood potassium levels (mmol/L).

A

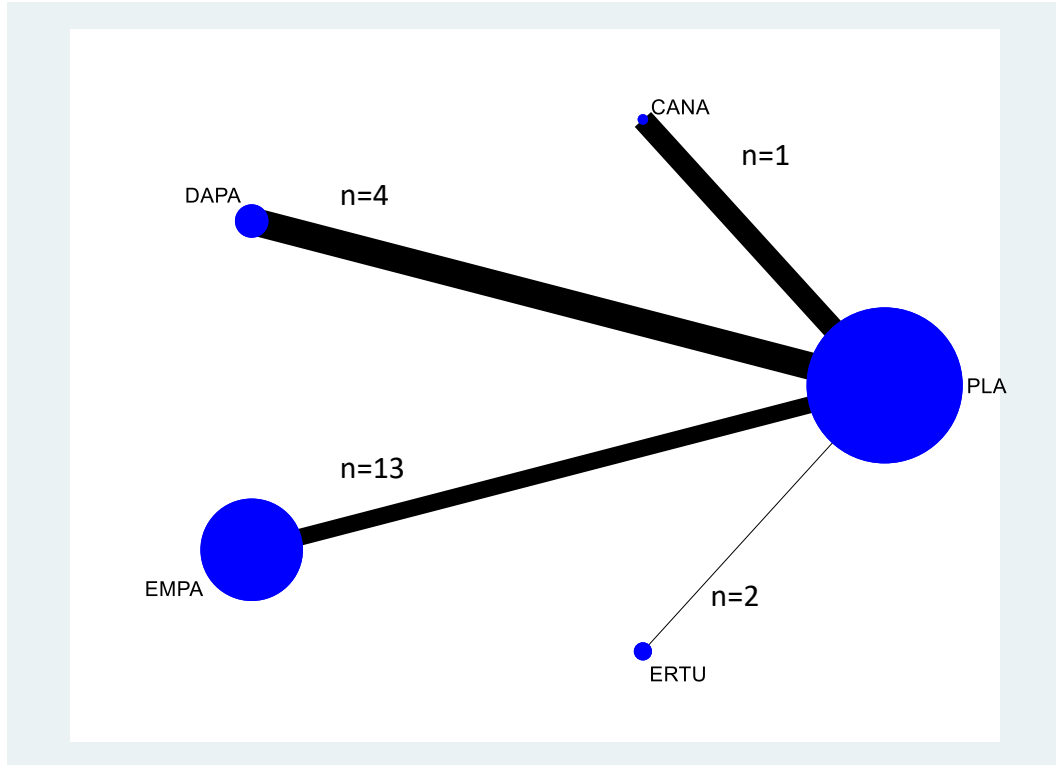

B

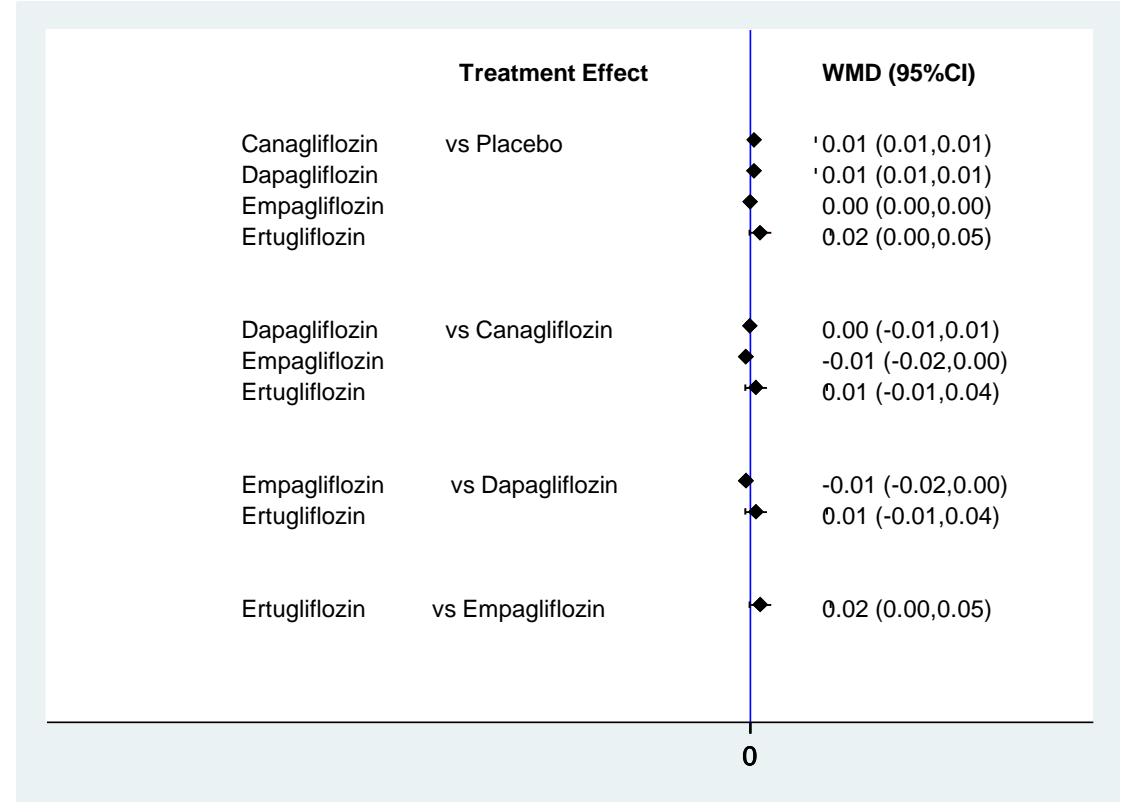

**Supplemental Figure 5A.** Network of eligible comparisons for the multiple-SGLT2 inhibitors meta-analysis for effects on blood calcium levels.  
**Supplemental Figure 5B.** Network meta-analysis of eligible trials for the effects of SGLT2 inhibitors on blood calcium levels (mmol/L).
